# Supplementary material
Source: Springer Nature journal article supplement (https://www.springermedizin.de/resource/supplementary/12936_2007_478_MOESM6_ESM.pdf/9548134)

Relative gene expression

100

10

1

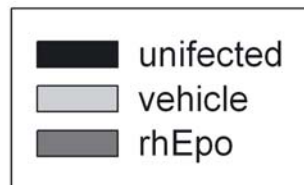

IL 1b

TNF

LT a

INF g

Casp 1

Casp 3

\*\*

\*\*

\*\*

Supplement: MOESM6 [file 9548134]
